# Analysis of Oxygen, Carbon Dioxide and Nitrous Oxide Mixtures with the Scholander Apparatus

A. Millar Forbes, M.R.C.P.E., F.F.A.R.C.S.,\* Marjam G. Behar, Ph.D.,†  
Theodore C. Smith, M.D.‡

Mixtures of nitrous oxide, oxygen, and carbon dioxide can be analyzed by the Scholander apparatus with a 95 per cent confidence of 1 per cent of the gas concentration. The technique follows the description of Scholander and differs principally in the exposure of two samples of the gas to the two absorbing reagents, as well as a determination of the solubility coefficient of nitrous oxide in the reagents. The precision of this technique is not as good as the Scholander analysis of mixtures of oxygen, nitrogen, and carbon dioxide, but compares favorably with other methods appropriate to anesthetic mixtures. The apparatus is economical, durable, and available.

DETERMINATION of oxygen and carbon dioxide content in mixture of gases by chemical analysis ordinarily depends on the insolubility of the balance of the gases (usually nitrogen). If the background gas is only nitrous oxide, accurate analysis of the three components can be made by a modification of the Scholander micro-analytic method. Reproducibility is 0.06 per cent or better (95 per cent confidence limits) and accuracy is better than 1 per cent of the concentration of each gas. The method differs from the usual analysis of gases in air, requiring measurement of the solubility coefficient of nitrous oxide at the temperature of the water bath, and by exposure of separate samples to each absorbing solution.

## Principle

When a mixture of nitrous oxide, oxygen, and carbon dioxide is exposed to the oxygen

\* Research Fellow, and recipient of a Wellcome Trust Grant.

† Instructor in the Department of Anesthesia.

‡ Assistant Professor in Anesthesiology, and recipient of a Career Development Award 1-K3-GM-34,902-01.

Received from the Department of Anesthesia, University of Pennsylvania School of Medicine, Philadelphia, Pennsylvania; accepted for publication March 14, 1967. This work was supported (in part) by U.S.P.H.S. Grant GM-09070-05 from the National Institutes of Health.

absorber (alkaline sodium hydrosulfite), all carbon dioxide and oxygen is chemically absorbed. Nitrous oxide partitions between the gas phase and the absorber. The volume of nitrous oxide in simple solution is determined by its solubility coefficient in the absorber at the temperature of the water bath, the volume of the absorber, and by atmospheric pressure.

When a second sample of the same gas mixture is exposed to the carbon dioxide absorber (sodium hydroxide solution), carbon dioxide is chemically absorbed and some nitrous oxide passes into simple solution, again depending on its solubility and concentration, the temperature, the volume of the absorber, and pressure. If pure nitrous oxide is exposed to the two solutions, the Ostwald solubility coefficient for nitrous oxide in the reagents may be determined. From the four exposures of gas to reagents, two pairs of simultaneous linear equations are derived; the first permits the calculation of nitrous oxide concentration in the sample, and the second permits calculation of oxygen and carbon dioxide content.

## Method

*Modifications of the Scholander method.* The technique generally follows that described by Scholander.<sup>1</sup> Attention to a number of details is important in achieving reproducibility. A list of these details, along with a derivation of the equations for calculating final concentrations appear in the Appendix.

Initially the micrometer scale is set at approximately 5 units. The gas sample-mercury interface is brought to the mark on the capillary tube and micrometer reading  $M_1$  made. Approximately 0.5 ml. of gas (about 15 micrometer units) is admitted to the reaction chamber, followed by an indicator drop of acid-rinsing solution (ARS). The compensating chamber is emptied, the gas-ARS interface brought to the mark, the open stopcock put in





brated with a bubble flow meter. The carbon dioxide concentration varied from 0 to 5 per cent oxygen from 20 to 30 per cent, and nitrous oxide from 65 to 75 per cent. A mixed sample from the rotameters was collected over mercury during a one minute period. Simultaneously, an aliquot of the mixed gases was passed through a Beckman C2 paramagnetic oxygen analyzer (0 to 50 per cent  $O_2$  scale) and a Godart Kapnograph. The oxygen analyzer was calibrated with air and nitrogen, and a correction made for the slightly diamagnetic property of nitrous oxide. The Kapnograph was calibrated with carbon dioxide in oxygen mixtures and correction made for both the spectral overlap of nitrous oxide and the collision-broadening effect. Thus, there were three independent estimates of the gas composition: chemical analysis with micro-Scholander technique; physical analysis of infrared and paramagnetic properties; and volumetric analysis from the rotameter readings. Table 2 contains the results of these analyses. The volumetric analysis by rotameter probably has an accuracy of  $\pm 1$  per cent of the gas composition. The accuracy of the infrared analysis for carbon dioxide was of the order of one-half of one per cent of the gas concentration, when the appropriate corrections for nitrous oxide were made.<sup>3</sup> The Beckman C2 oxygen analyzer had an accuracy of  $\pm 2$  per cent of the oxygen concentration used in this study. Table 2 shows that the Scholander analysis of the four gas samples agreed with the rotameter and physical analyses within the order of accuracy of the latter two techniques. In the absence of a primary standard with which to compare the chemical analysis, we can only say that the accuracy of the Scholander technique when nitrous oxide, oxygen, and carbon dioxide mixtures are being analyzed, is at least of the order of 1 per cent of the concentration of the gases being analyzed.

### Discussion

The method gives reproducible analysis of dry gas concentrations of mixtures of nitrous oxide, oxygen, and carbon dioxide. All three gas concentrations are measured during the same procedure. An analyst already familiar

with the Scholander apparatus will require a slightly longer time to perform the analyses. Minor errors due to nitrogen and oxygen content of the reagents are acknowledged. During measurement of solubility coefficients, small volumes of oxygen and nitrogen pass into the gas phase. With samples of nitrous oxide, oxygen, and carbon dioxide, similar diffusion takes place. When the sample oxygen concentration is 21 per cent there is no exchange of oxygen; when  $F_{IO_2}$  is greater than 0.21, a small volume of oxygen passes from the gas into the liquid phase of the carbon dioxide absorber. The exchange of oxygen and nitrogen gives rise to small errors, which can be disregarded if  $F_{IO_2}$  is less than 0.5. This is part of the explanation for the negative value for carbon dioxide in Table 1.

The negative value for carbon dioxide is also explained in part by the slight deviation from a direct relationship between the concentration of nitrous oxide in a mixture and its solubility in liquids.<sup>4</sup> The higher the concentration, the greater the solubility.  $F_{N_2O}$  in the range of 0.6 to 0.9 causes an underestimation of  $F_{CO_2}$  by 0.02 to 0.01.

### References

1. Scholander, P. F.: Analyzer for accurate estimation of respiratory gases in one-half cubic centimeter samples, *J. Biol. Chem.* 167: 1, 1947.
2. Saidman, L. J., Eger, E. I., II, Munson, E. S., and Severinghaus, J. W.: A method for determining solubility of anesthetics utilizing the Scholander apparatus, *ANESTHESIOLOGY* 27: 180, 1966.
3. Smith, T. C., Colton, E. T., and Dripps, R. D.: Mixed venous-arterial carbon dioxide tension difference in anesthetized man (Abstract), *Fed. Proc.* 26: 2, 1967.
4. Findlay, A., and Craighton, N. J. M.: Some experiments on the solubility of gases in ox blood and ox serum, *Biochem. J.* 5: 294, 1911.

### APPENDIX

#### *Supplementary Details of the Method*

1. Temperature equilibrium must be established within the water bath. Water bath temperature must be measured at the start of the analysis, and thereafter kept constant ( $\pm 0.1^\circ C.$ ). The water bath can be mixed with a slow stream of air bubbles.
2. Before each gas sample is introduced, the mercury is brought into the capillary tube. The analyst must then wait for 60-120 seconds to

allow ARS to escape from the reaction chamber, where a small volume tends to remain temporarily between the mercury and the side walls.

3. The gas sample must be kept under slight positive pressure during transfer from the tonometer by allowing the mercury column in the pipette to fall slowly. Use of a syringe is less easy and not recommended.

4. An effort is made to exclude all ARS from the capillary tube during introduction of the gas sample. If present, ARS dissolves some gas before the initial gas volume can be measured, and the absorber subsequently admitted is diluted with ARS.

5. Micrometer reading  $M_1$  should be within the range 4.8 to 5.2.

6. After bringing the gas sample into the reaction chamber and drawing an indicator drop into place, the ARS is removed from the compensating chamber. Air must not be sucked through the chamber as evaporative cooling becomes significant. The stopcock is then replaced. It is left open for 20-30 seconds until the slight movement of the indicator drop ceases. During this time temperature equilibration and humidification of air in the compensating chamber take place. A minute volume of gas dissolves in the ARS of the indicator droplet. With a small indicator drop, this change in volume should never be greater than 0.020 micrometer units, and often is near zero. As a check,  $M_2$  should not change when the stopcock is closed.

7. Four to five micrometer units of absorber is the optimum volume; 3.5 to 5.5 units is acceptable. Outside this range, analysis is unsatisfactory. With volumes greater than 5.5 units, the initial movement of the indicator drop tends to be very rapid. Also, a much longer time than 90-120 seconds is required for complete solution and equilibration to take place. With volumes less than 3.5 units, errors in micrometer reading and dilution with the minimal drop of ARS become proportionately greater.

8. The shaking of the apparatus should be controlled so that the absorber covers the side walls of the reaction chamber up to a level just below the capillary tube. Control of the agitation can be achieved manually with the analyst's right hand on the dowel attached to the micrometer handle and his left hand on the horse-shoe part of the micrometer burette units, or by adjusting the tension in the spring connected to the eccentric pin on the counterpulley. This provides the maximum gas-absorber interface, and allows for the most rapid and complete absorption. Complete absorption is confirmed by the meniscus remaining stationary in the capillary tube during the last 10 seconds of agitation. Ninety seconds for carbon dioxide absorption and 120 seconds for oxygen is usually sufficient. If during shaking the absorber passes into the capillary tube, the analysis should be discontinued.

9. The indicator drop must be kept as stationary as possible during exposure to the absorber. This minimizes diffusion of nitrous oxide across the drop. In the absence of movement of the indicator drop, experiments with 100 per cent nitrous oxide showed less than 0.1 per cent of initial gas volume lost in 10 minutes. If the drop was deliberately moved continuously, the loss was never more than 2.4 per cent in 10 minutes. Shaking of the apparatus brought about the loss of less than 0.1 per cent of the initial gas volume during three minutes. An alternative approach to minimize diffusion recommends a continuous flow of nitrous oxide through the compensating chamber during analysis.<sup>2</sup> The disadvantages are that it is impossible to judge an appropriate flow rate which will replace the air present, but will not produce appreciable evaporative cooling. It is also less convenient than the usual method. As a direct comparison, the solubility of nitrous oxide in carbon dioxide absorber was measured at constant temperature, first with air in the compensating chamber, and then with nitrous oxide flowing through slowly. The means of 6 analyses by each method differed by only 0.16 per cent, the variability of each group being of the same order.

An attempt was made to use mercury in the indicator drop, but it proved unsatisfactory owing to its high specific gravity and surface tension.

10. Throughout the analysis it is unnecessary to bring the indicator drop down to the piccolyte coating of the reaction chamber before reading the micrometer. Mixing of the gas in the reaction chamber is rapid. There is no evidence that a significant volume of ARS adheres to the side walls of the capillary tube, or that such ARS there may be is removed by bringing the indicator drop down to the piccolyte.

11. When  $M_1$  is read, the gas absorber interface is brought to the meniscus. This reading should be made without delay, as 0.010-0.020 micrometer units of ARS may slide down the capillary tube on the top of the absorber. The stopcock should, of course, be open for this reading.

#### Derivation of Equations

##### A. Exposure to Oxygen Absorber

$$V_{GA} = V_{ACO_2} + V_{AO_2} + V_{AN_2O} \quad (1)$$

$$= V_{CO_2} + V_{O_2} + V_{AN_2O}$$

Because of complete removal of  $CO_2$  and  $O_2$ ,

$$V_{IN_2O} = V_{GF} + V_{AN_2O}$$

Also,

$$V_{AN_2O} = \lambda OA \times VA$$

From (2) and (3)

$$V_{IN_2O} = V_{GF} + (\lambda OA \times VA)$$

$$\therefore F_{IN_2O} = \frac{V_{IN_2O}}{V_{GI}} = \frac{V_{GF} + (\lambda OA \times VA)}{V_{GI}}$$

From (1) and (3)

$$V_{GA} - (\lambda_{OA} \times V_A) = V_{ICo_2} + V_{IO_2}$$

Dividing both sides by  $V_{GI}$  to convert to fractional concentration:

$$\therefore F_{ICo_2} + F_{IO_2} = \frac{V_{GA} - (\lambda_{OA} \times V_A)}{V_{GI}} \quad (5)$$

**B. Exposure to Carbon Dioxide Absorber**

$$\begin{aligned} V_{GA} &= V_{ACo_2} + V_{AN_2O} \\ &= V_{ICo_2} + \lambda_{CA} \cdot V_A \cdot F_{FN_2O} \\ &= V_{ICo_2} + \lambda_{CA} \cdot V_A \frac{(V_{GF} - V_{IO_2})}{V_{GF}} \end{aligned}$$

Multiplying both sides by  $V_{GF}$ , rearranging, and converting to fractional concentration gives:

$$\begin{aligned} V_{GF} \cdot F_{ICo_2} - \lambda_{CA} \cdot V_A F_{IO_2} \\ = \frac{V_{GF} (V_{GA} - \lambda_{CA} V_A)}{V_{GI}} \quad (6) \end{aligned}$$

Equation (4) gives the fractional concentration of  $N_2O$  directly. Equations (5) and (6) enable calculation of  $F_{O_2}$  and  $F_{CO_2}$ . Equation (6) assumes no solution of oxygen in the reagent. As long as the sample contains less than 50 per cent oxygen this assumption results in no appreciable error. If more than 50 per cent oxygen is present, the  $CO_2$  absorber should be equilibrated with oxygen before use, as suggested by Scholander in the original method.

**Surgery**

**POSTOPERATIVE HEPATITIS** Fifteen patients are reported who developed postoperative hepatitis after receiving halothane anesthesia. Nine of these had multiple administrations of the agent; eight of these cases became jaundiced within 8 days of the last surgical procedure. In the reported cases transfusion was essentially ruled out as a causal agent as were other possible hepatotoxic medications. Two of the patients had pre-existing liver disease; none gave historic evidence of recent exposure to infectious hepatitis. The evidence of these cases is suggestive but not conclusive that hepatotoxicity is more frequent after multiple exposures to halothane and in those patients with a history of previous liver disease. (*Mendel, E., and Trostel, R.: Hepatitis following Halothane Anesthesia, Pacific Med. 75: 28 (Jan.) 1967.*)

**STERILIZATION OF APPARATUS** The use of anesthesia equipment results in contamination of that equipment in as high as 80 per cent of the items employed. (No protection is offered by the soda-lime cannister on anesthesia machines, although this has been reported.) Adverse reactions to potent germicidal agents applied to apparatus have long since been reported and have eliminated otherwise satisfactory methods of sterilization. No difficulty of this sort was experienced with buffered glutaraldehyde which was found to be superior to hexachlorophene and a 70 per cent alcohol soak. The sterilizing action of ethylene-oxide gas has been reported and its application to decontamination of anesthesia apparatus has been suggested. Because of the various requirements of processing, especially the time element and the bulkiness of quite large amounts of rubber articles, it often is not feasible to adopt this method. A carefully documented relationship between contaminated anesthesia apparatus and the incidence of postoperative infections should be studied further. In the interim, decontamination by use of buffered glutaraldehyde is superior to many presently used techniques. (*Meeks, C. H., and others: Sterilization of Anesthesia Apparatus, J.A.M.A. 199: 276 (Jan.) 1967.*)
